# Supplementary material
Source: Springer Nature journal article supplement (https://www.springermedizin.de/resource/supplementary/12889_2012_4445_MOESM1_ESM.pdf/9492814)
Supplement: MOESM1 [file 9492814]

Women recruited via "Exercise on Prescription"

Women recruited via general practices list

Allocation

Allocated to intervention: n= 192  
Received allocated intervention: n=190  
Did not receive allocated intervention: n=2,  
they never started the program.

Allocated to control group: n= 322

Follow-Up 1

Lost to follow-up: n=71  
Reasons: did not show or moved away  
Discontinued intervention: n=27  
Reasons: health problems, moved away  
Analysed: n=121

Lost to follow-up: n= 103  
Reasons: did not show or moved away  
Analysed: 219

Follow-Up 2

Lost to follow-up compared to baseline: n=70  
Reasons: did not show, moved away  
Analysed: n=122

Lost to follow-up compared to baseline: n= 135  
Reasons: did not show, moved away.  
Analysed: n=187
